# Supplementary material for: Assessment of Spatiotemporal Variations in the Water Quality of the Han River Basin, South Korea, Using Multivariate Statistical and APCS-MLR Modeling Techniques
Source: MDPI journal article supplement (doi:10.3390/agronomy11122469), 2021-12-03
Supplement: s1 [file s1]

## **Supplementary Information**

# **Assessment of Spatiotemporal Variations in the Water Quality of the Han River Basin, South Korea, using Multivariate Statistical and APCS-MLR Modeling Techniques**

Yong Chul Cho, Hyeonmi Choi, Soon Ju Yu, Sang Hun Kim\*, Jong Kwon Im\*

National Institute of Environmental Research, Han River Environment Research Center, 42,  
Dumulmeori-gil 68beon-gil, Yangseo-myeon, Yangpyeong-gun, Gyeonggi-do, 12585, Republic of  
Korea

## **Table of Contents**

**Figure S1.** Spatial variation of water quality parameters (a) WT, (b) EC, (c) COD, (d) TSS, (e) TP and (f) Chl-*a* in the monitoring sites of Han River Basin, South Korea.

**Figure S2.** Precipitation and discharge in the Han River Basin from 2011 to 2020.

**Figure S3.** Eigenvalue change with number of principal components (a) MPR, (b) LPR and (c) HPR.

**Table S1.** Information of analytical methods and instrument.

**Table S2.** Summary descriptive statistics of water quality parameters between 2011 and 2020.

**Table S3.** Results of Shapiro-Wilk test for normality.

**Table S4.** Descriptive statistics of water quality variables in different clusters in Han River Basin.

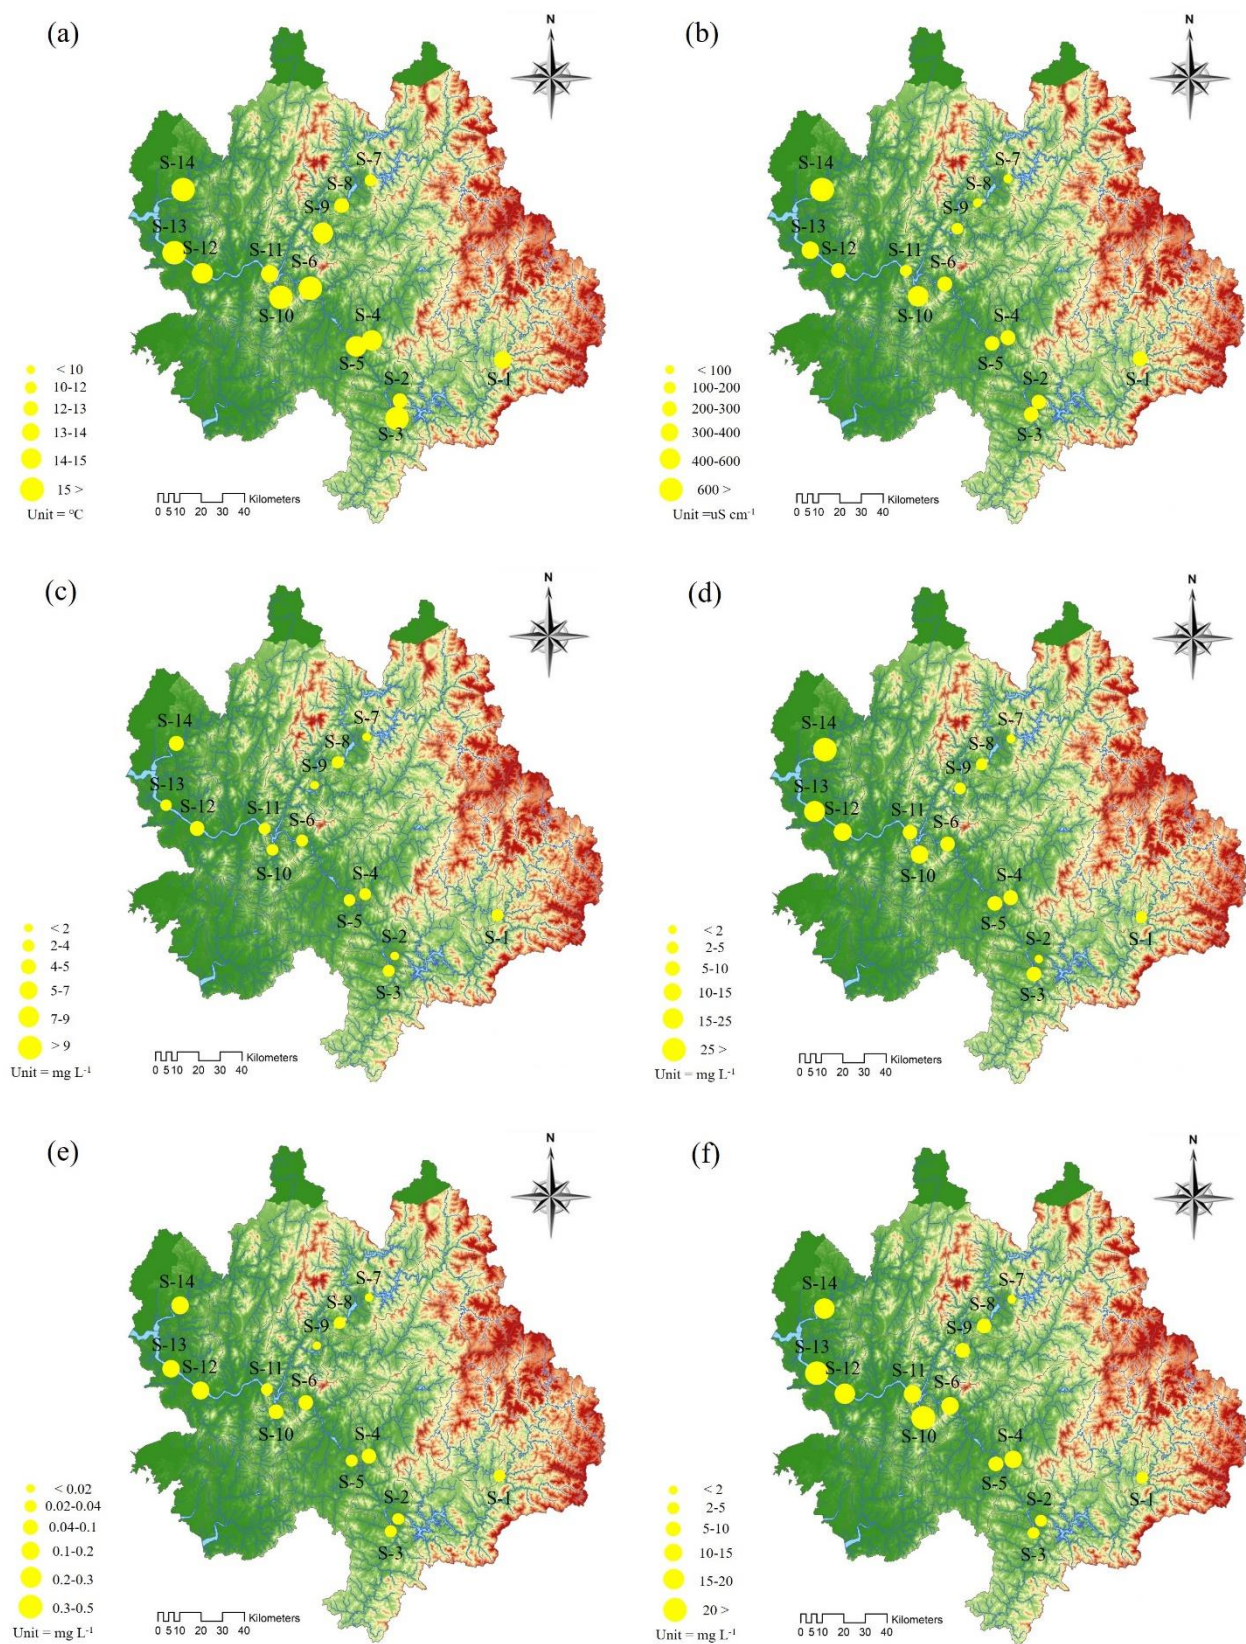

**Figure S1.** Spatial variation of water quality parameters in the monitoring sites of Han River Basin, South Korea. (a) WT, (b) EC, (c) COD, (d) TSS, (e) TP and (f) Chl-*a*.

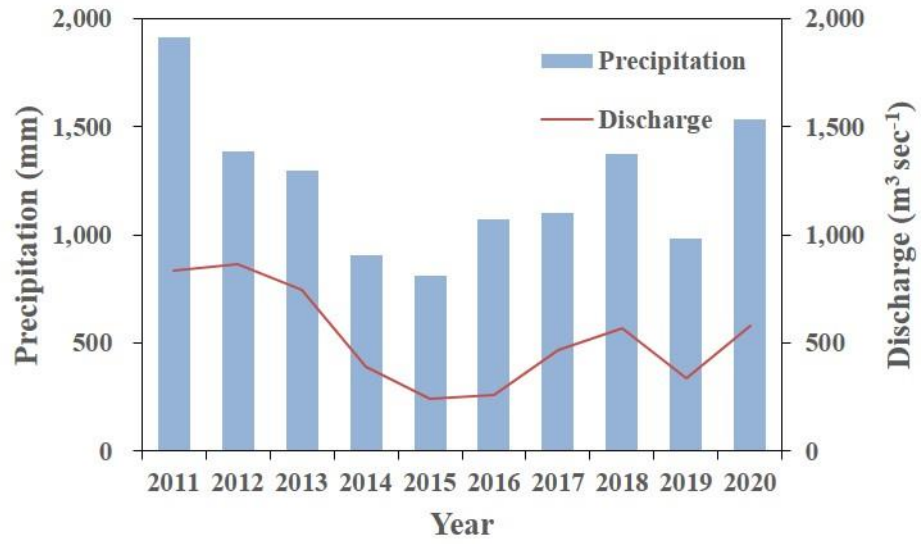

**Figure S2.** Precipitation and discharge in the Han River Basin from 2011 to 2020.

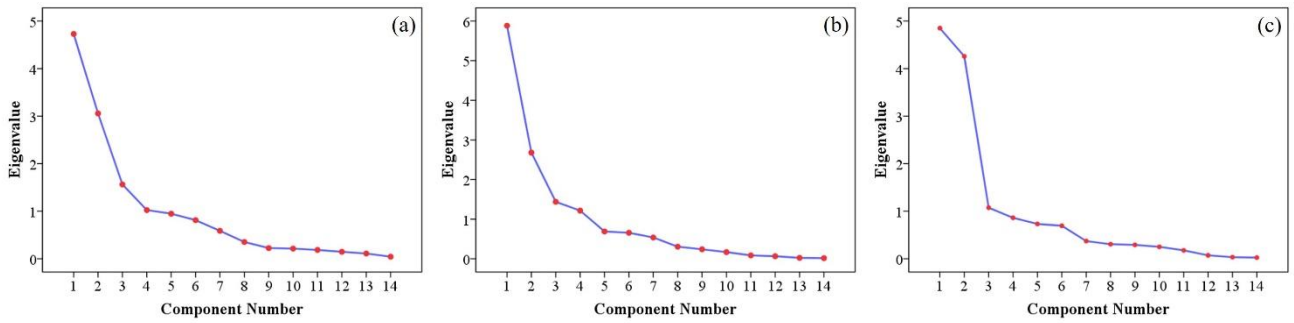

**Figure S3.** Eigenvalue change with number of principal components. (a) MPR, (b) LPR and (c) HPR.

**Table S1.** Information of analytical methods and instrument.

| Parameters         | Unit                  | Analytical methods                       | Analytical Instrument                     |
|--------------------|-----------------------|------------------------------------------|-------------------------------------------|
| WT                 | °C                    | Temperature probe                        | 600 XLM (YSI, USA)                        |
| pH                 | -                     | pH probe                                 | 600 XLM (YSI, USA)                        |
| EC                 | $\mu\text{S cm}^{-1}$ | Conductometry                            | 600 XLM (YSI, USA)                        |
| DO                 | $\text{mg L}^{-1}$    | Do probe                                 | 600 XLM (YSI, USA)                        |
| BOD                | $\text{mg L}^{-1}$    | Winkler azide method                     | DO Meter (YSI 5910), BOD Incubator        |
| COD                | $\text{mg L}^{-1}$    | KMnO <sub>4</sub> method                 | Water Bath (100 °C Acid)                  |
| TSS                | $\text{mg L}^{-1}$    | Gravimetric                              | Whatman GF/C Filter                       |
| TN                 | $\text{mg L}^{-1}$    | Continuous flow analysis                 | AACS_VI (BLTEC, Japan)                    |
| NH <sub>3</sub> -N | $\text{mg L}^{-1}$    | Continuous flow analysis                 | AACS_VI (BLTEC, Japan)                    |
| NO <sub>3</sub> -N | $\text{mg L}^{-1}$    | SmartChem                                | SmartChem 200 (AMS Alliance, USA)         |
| TP                 | $\text{mg L}^{-1}$    | Continuous flow analysis                 | AACS_VI (BLTEC, Japan)                    |
| PO <sub>4</sub> -P | $\text{mg L}^{-1}$    | SmartChem                                | SmartChem 200 (AMS Alliance, USA)         |
| TOC                | $\text{mg L}^{-1}$    | High temperature combustion<br>oxidation | TOC-LCPH (Shimadzu, Japan)                |
| Chl-a              | $\text{mg m}^{-3}$    | UV-Visible Spectrophotometer             | Agilent technologies (AU/Carry 3500, USA) |

**Table S2.** Summary descriptive statistics of water quality parameters between 2011 and 2020.

| Sites          | Statistics | WT   | pH  | EC   | DO   | BOD | COD  | TOC  | TSS   | TN    | NH <sub>3</sub> -N | NO <sub>3</sub> -N | TP    | PO <sub>4</sub> -P | Chl-a |
|----------------|------------|------|-----|------|------|-----|------|------|-------|-------|--------------------|--------------------|-------|--------------------|-------|
| S-1<br>(N=119) | Min.       | 0.3  | 7.5 | 166  | 8.8  | 0.2 | 1.6  | 0.6  | 0.3   | 1.516 | 0.001              | 1.065              | 0.005 | 0.000              | 0.5   |
|                | Mean       | 14.3 | 8.4 | 265  | 12.0 | 1.1 | 2.9  | 2.2  | 4.0   | 3.160 | 0.048              | 2.381              | 0.030 | 0.014              | 3.0   |
|                | Max.       | 27.3 | 9.2 | 390  | 18.3 | 2.4 | 5.6  | 4.7  | 33.9  | 6.698 | 0.212              | 3.620              | 0.454 | 0.414              | 11.9  |
|                | S. D.      | 8.1  | 0.3 | 43   | 2.2  | 0.4 | 0.7  | 0.7  | 4.7   | 0.773 | 0.029              | 0.547              | 0.050 | 0.044              | 2.4   |
| S-2<br>(N=119) | Min.       | 3.7  | 7.5 | 149  | 5.0  | 0.3 | 1.8  | 0.7  | 0.2   | 1.729 | 0.002              | 1.225              | 0.005 | 0.000              | 0.6   |
|                | Mean       | 13.1 | 8.1 | 218  | 9.9  | 0.8 | 2.6  | 2.0  | 1.9   | 2.519 | 0.062              | 1.866              | 0.023 | 0.009              | 2.1   |
|                | Max.       | 24.0 | 8.8 | 286  | 22.9 | 1.8 | 4.3  | 3.3  | 14.0  | 5.066 | 0.184              | 2.609              | 0.273 | 0.095              | 7.4   |
|                | S. D.      | 5.9  | 0.3 | 26   | 2.7  | 0.3 | 0.5  | 0.5  | 1.6   | 0.496 | 0.035              | 0.253              | 0.028 | 0.010              | 1.2   |
| S-3<br>(N=119) | Min.       | 0.0  | 7.3 | 133  | 7.5  | 0.2 | 1.9  | 0.1  | 0.5   | 0.777 | 0.003              | 0.059              | 0.006 | 0.000              | 0.5   |
|                | Mean       | 15.9 | 8.2 | 12.4 | 12.4 | 1.1 | 2.5  | 2.5  | 3.1   | 2.381 | 0.057              | 1.704              | 0.036 | 0.010              | 3.8   |
|                | Max.       | 30.7 | 9.1 | 20.3 | 20.3 | 2.0 | 6.0  | 6.0  | 50.6  | 6.370 | 0.239              | 3.787              | 0.236 | 0.082              | 13.8  |
|                | S. D.      | 9.0  | 0.4 | 2.5  | 2.5  | 0.4 | 0.9  | 0.9  | 6.9   | 0.970 | 0.039              | 0.716              | 0.038 | 0.011              | 2.4   |
| S-4<br>(N=119) | Min.       | 0.3  | 7.2 | 90   | 8.2  | 0.5 | 2.7  | 1.6  | 1.0   | 0.912 | 0.004              | 0.304              | 0.015 | 0.001              | 1.5   |
|                | Mean       | 14.7 | 8.1 | 268  | 11.7 | 1.5 | 4.8  | 2.9  | 9.5   | 3.553 | 2.478              | 2.478              | 0.072 | 0.035              | 11.4  |
|                | Max.       | 28.5 | 9.1 | 518  | 16.6 | 3.6 | 13.5 | 10.7 | 331.5 | 8.184 | 4.813              | 4.200              | 0.241 | 0.180              | 62.0  |
|                | S. D.      | 9.1  | 0.4 | 83.4 | 1.9  | 0.7 | 1.4  | 1.0  | 30.9  | 1.494 | 0.825              | 0.872              | 0.047 | 0.037              | 11.7  |
| S-5<br>(N=119) | Min.       | 2.5  | 7.5 | 90   | 7.9  | 0.4 | 2.0  | 1.3  | 1.4   | 1.419 | 0.005              | 1.020              | 0.013 | 0.000              | 0.8   |
|                | Mean       | 14.3 | 8.1 | 234  | 11.4 | 1.1 | 3.6  | 2.1  | 7.5   | 2.506 | 0.062              | 2.031              | 0.040 | 0.016              | 7.5   |
|                | Max.       | 27.4 | 9.0 | 305  | 15.6 | 2.9 | 5.9  | 4.0  | 55.7  | 3.760 | 0.289              | 3.155              | 0.179 | 0.100              | 35.0  |
|                | S. D.      | 7.4  | 0.3 | 32.6 | 1.8  | 0.5 | 0.7  | 0.5  | 8.7   | 0.381 | 0.060              | 0.381              | 0.029 | 0.019              | 6.3   |
| S-6<br>(N=116) | Min.       | 1.6  | 7.4 | 134  | 7.8  | 0.4 | 2.3  | 1.4  | 0.8   | 1.402 | 0.008              | 0.913              | 0.016 | 0.000              | 0.4   |
|                | Mean       | 15.0 | 8.1 | 251  | 11.4 | 1.4 | 4.0  | 2.3  | 9.2   | 2.623 | 0.079              | 2.116              | 0.046 | 0.016              | 11.1  |
|                | Max.       | 29.5 | 9.0 | 347  | 14.8 | 3.7 | 7.0  | 3.9  | 162.8 | 3.770 | 0.415              | 3.073              | 0.168 | 0.070              | 56.7  |
|                | S. D.      | 8.2  | 0.4 | 43.1 | 1.7  | 0.8 | 0.8  | 0.5  | 18.0  | 0.445 | 0.068              | 0.423              | 0.027 | 0.016              | 9.6   |
| S-7<br>(N=119) | Min.       | 4.3  | 7.1 | 51   | 8.7  | 0.2 | 2.0  | 1.1  | 0.3   | 1.277 | 0.001              | 1.071              | 0.004 | 0.000              | 0.4   |
|                | Mean       | 9.8  | 8.0 | 73   | 12.0 | 0.3 | 2.7  | 1.6  | 2.2   | 1.606 | 0.011              | 1.383              | 0.013 | 0.002              | 1.8   |
|                | Max.       | 20.2 | 8.7 | 95   | 14.3 | 0.8 | 3.8  | 2.4  | 15.8  | 2.164 | 0.044              | 1.855              | 0.068 | 0.017              | 4.5   |
|                | S. D.      | 3.5  | 0.3 | 9.4  | 12.0 | 0.1 | 0.4  | 0.2  | 3.0   | 0.197 | 0.007              | 0.165              | 0.013 | 0.003              | 0.9   |

| Sites   | Statistics | WT   | pH  | EC   | DO   | BOD | COD  | TOC | TSS   | TN     | NH <sub>3</sub> -N | NO <sub>3</sub> -N | TP    | PO <sub>4</sub> -P | Chl-a |
|---------|------------|------|-----|------|------|-----|------|-----|-------|--------|--------------------|--------------------|-------|--------------------|-------|
| S-8     | Min.       | 2.9  | 7.3 | 73   | 7.6  | 0.2 | 1.2  | 1.2 | 1.0   | 1.114  | 0.019              | 0.809              | 0.06  | 0.000              | 1.4   |
| (N=119) | Mean       | 13.2 | 8.0 | 96   | 11.4 | 1.2 | 3.1  | 2.0 | 4.0   | 1.919  | 0.100              | 1.313              | 0.020 | 0.006              | 7.3   |
|         | Max.       | 24.6 | 9.6 | 138  | 16.5 | 2.5 | 5.3  | 3.0 | 35.0  | 4.147  | 0.256              | 2.134              | 0.099 | 0.043              | 24.2  |
|         | S. D.      | 6.4  | 0.4 | 13   | 1.8  | 0.4 | 0.6  | 0.4 | 4.0   | 0.543  | 0.055              | 0.258              | 0.015 | 0.005              | 3.9   |
| S-9     | Min.       | 0.5  | 7.1 | 76   | 7.8  | 0.4 | 2.3  | 1.2 | 0.9   | 1.263  | 0.005              | 1.047              | 0.008 | 0.000              | 1.7   |
| (N=114) | Mean       | 14.2 | 7.8 | 116  | 10.9 | 0.9 | 3.3  | 1.9 | 3.7   | 1.831  | 0.049              | 1.494              | 0.018 | 0.002              | 8.3   |
|         | Max.       | 28.8 | 8.7 | 228  | 14.9 | 1.8 | 5.2  | 3.7 | 16.4  | 2.994  | 0.255              | 2.434              | 0.059 | 0.013              | 23.5  |
|         | S. D.      | 7.9  | 0.3 | 23.2 | 1.7  | 0.3 | 0.5  | 0.3 | 2.8   | 0.281  | 0.045              | 0.242              | 0.010 | 0.002              | 4.7   |
| S-10    | Min.       | 1.5  | 6.7 | 142  | 7.9  | 0.7 | 3.1  | 1.3 | 1.8   | 2.003  | 0.011              | 1.339              | 0.017 | 0.003              | 1.8   |
| (N=119) | Mean       | 15.3 | 7.9 | 410  | 11.2 | 2.2 | 5.9  | 2.8 | 13.3  | 4.528  | 0.543              | 3.294              | 0.062 | 0.022              | 25.6  |
|         | Max.       | 29.3 | 8.8 | 623  | 16.1 | 5.9 | 11.7 | 5.5 | 58.3  | 9.357  | 4.115              | 6.232              | 0.165 | 0.126              | 144.9 |
|         | S. D.      | 8.4  | 0.4 | 95   | 1.9  | 1.2 | 1.6  | 0.6 | 9.6   | 1.820  | 0.771              | 1.123              | 0.030 | 0.022              | 27.1  |
| S-11    | Min.       | 0.9  | 7.2 | 104  | 4.3  | 0.6 | 2.5  | 1.3 | 1.3   | 1.316  | 0.009              | 0.885              | 0.009 | 0.000              | 2.2   |
| (N=119) | Mean       | 13.5 | 7.9 | 184  | 10.4 | 1.2 | 3.7  | 2.2 | 6.5   | 2.167  | 0.060              | 1.753              | 0.032 | 0.007              | 12.1  |
|         | Max.       | 26.5 | 8.8 | 271  | 15.0 | 2.1 | 5.2  | 3.3 | 67.0  | 3.092  | 0.266              | 2.612              | 0.117 | 0.048              | 31.2  |
|         | S. D.      | 7.6  | 0.4 | 37   | 2.3  | 0.3 | 0.5  | 0.3 | 7.8   | 0.370  | 0.040              | 0.347              | 0.020 | 0.009              | 5.5   |
| S-12    | Min.       | 1.5  | 7.3 | 117  | 5.6  | 0.8 | 3.7  | 1.9 | 2.6   | 2.295  | 0.082              | 1.582              | 0.040 | 0.002              | 3.0   |
| (N=119) | Mean       | 15.0 | 7.8 | 258  | 10.2 | 2.3 | 5.2  | 3.3 | 10.7  | 4.577  | 0.763              | 2.947              | 0.134 | 0.074              | 18.6  |
|         | Max.       | 28.3 | 8.7 | 566  | 16.4 | 5.5 | 9.2  | 6.4 | 86.0  | 11.820 | 3.023              | 7.527              | 0.316 | 0.233              | 89.2  |
|         | S. D.      | 8.2  | 0.3 | 75   | 2.3  | 1.0 | 1.0  | 0.8 | 10.3  | 1.426  | 0.561              | 0.933              | 0.070 | 0.065              | 13.1  |
| S-13    | Min.       | 1.5  | 7.3 | 108  | 6.1  | 0.6 | 3.2  | 1.5 | 3.7   | 2.349  | 0.043              | 1.431              | 0.028 | 0.004              | 2.6   |
| (N=116) | Mean       | 15.4 | 7.9 | 340  | 10.6 | 2.3 | 5.5  | 2.7 | 17.6  | 4.234  | 0.721              | 2.824              | 0.119 | 0.065              | 24.9  |
|         | Max.       | 28.5 | 8.7 | 2140 | 16.4 | 6.0 | 10.7 | 4.7 | 52.9  | 11.850 | 4.355              | 6.415              | 0.282 | 0.225              | 119.9 |
|         | S. D.      | 8.3  | 0.3 | 230  | 2.4  | 1.2 | 1.2  | 0.5 | 10.4  | 1.444  | 0.616              | 0.916              | 0.055 | 0.051              | 20.2  |
| S-14    | Min.       | 0.9  | 6.9 | 108  | 6.9  | 0.4 | 3.1  | 1.3 | 10.6  | 1.376  | 0.017              | 0.891              | 0.037 | 0.007              | 0.4   |
| (N=117) | Mean       | 15.3 | 7.8 | 1124 | 10.8 | 1.8 | 6.7  | 3.2 | 84.7  | 3.294  | 0.420              | 2.214              | 0.132 | 0.036              | 16.4  |
|         | Max.       | 29.4 | 8.7 | 5653 | 16.8 | 4.4 | 14.9 | 7.9 | 251.6 | 6.857  | 2.802              | 3.445              | 0.373 | 0.099              | 93.4  |
|         | S. D.      | 9.0  | 0.3 | 1192 | 2.5  | 1.0 | 2.3  | 1.2 | 45.7  | 1.110  | 0.560              | 0.614              | 0.068 | 0.017              | 14.1  |





**Table S4.** Descriptive statistics of water quality variables in different clusters in Han River Basin.

| Parameters         | MPR   |       |        |       | LPR   |       |       |       | HPR   |       |       |        |
|--------------------|-------|-------|--------|-------|-------|-------|-------|-------|-------|-------|-------|--------|
|                    | Mean  | Min.  | Max.   | S. E. | Mean  | Min.  | Max.  | S. E. | Mean  | Min.  | Max.  | S. E.  |
| WT                 | 14.5  | 0.9   | 28.5   | 0.43  | 13.9  | 0.1   | 30.7  | 0.23  | 15.2  | 0.9   | 29.4  | 0.85   |
| pH                 | 7.9   | 7.2   | 8.8    | 0.02  | 8.1   | 6.7   | 9.6   | 0.01  | 7.8   | 7.2   | 8.7   | 0.03   |
| EC                 | 261   | 104   | 2140   | 8.24  | 216   | 51    | 623   | 3.14  | 1165  | 134   | 5653  | 114.09 |
| DO                 | 10.4  | 4.3   | 16.4   | 0.13  | 11.4  | 5.0   | 22.9  | 0.06  | 10.8  | 6.9   | 15.6  | 0.23   |
| BOD                | 1.9   | 0.6   | 6.0    | 0.06  | 1.2   | 0.2   | 5.9   | 0.02  | 1.9   | 0.5   | 4.4   | 0.09   |
| COD                | 4.8   | 2.5   | 10.7   | 0.06  | 3.6   | 1.2   | 13.5  | 0.04  | 6.8   | 3.1   | 14.9  | 0.21   |
| TOC                | 2.7   | 1.3   | 6.4    | 0.04  | 2.2   | 0.1   | 10.7  | 0.02  | 3.2   | 1.3   | 7.9   | 0.12   |
| TSS                | 11.4  | 1.3   | 86.0   | 0.56  | 5.9   | 0.2   | 331.5 | 0.38  | 85.4  | 10.6  | 251.6 | 4.29   |
| TN                 | 3.667 | 1.316 | 11.850 | 0.09  | 2.660 | 0.777 | 9.969 | 0.04  | 3.310 | 1.376 | 6.857 | 0.11   |
| NH <sub>3</sub> -N | 0.521 | 0.009 | 4.355  | 0.03  | 0.151 | 0.001 | 4.813 | 0.01  | 0.423 | 0.017 | 2.802 | 0.05   |
| NO <sub>3</sub> -N | 2.509 | 0.885 | 7.527  | 0.05  | 2.001 | 0.059 | 6.575 | 0.02  | 2.220 | 0.891 | 3.445 | 0.06   |
| TP                 | 0.095 | 0.009 | 0.316  | 0.004 | 0.036 | 0.004 | 0.454 | 0.001 | 0.133 | 0.037 | 0.373 | 0.01   |
| PO <sub>4</sub> -P | 0.049 | 0.000 | 0.233  | 0.003 | 0.013 | 0.000 | 0.414 | 0.001 | 0.035 | 0.007 | 0.009 | 0.002  |
| Chl-a              | 18.7  | 2.2   | 119.9  | 0.81  | 8.2   | 0.4   | 144.9 | 0.36  | 16.8  | 1.2   | 93.4  | 1.34   |
